# Supplementary material
Source: bioRxiv or medRxiv preprint supplement (https://medrxiv.org/highwire/filestream/97094/field_highwire_adjunct_files/2/2020.09.15.20194258-3.pdf)
Supplement: Supplementary file [file 2020.09.15.20194258-3.pdf]

**Supplementary Table 1 | Results for all linear regression models**

| Model | formula                                         | predictor    | estimate | CI2.5  | CI97.5 | p        | R2    |
|-------|-------------------------------------------------|--------------|----------|--------|--------|----------|-------|
| 1     | log(nCases_maxNPI) ~ CESTtoNPI                  | CESTtoNPI    | 0.076    | 0.042  | 0.11   | 3.80E-05 | 0.268 |
| 2     | log(nCases_maxNPI) ~ log(popSize)               | log(popSize) | 0.638    | 0.262  | 1.013  | 1.25E-03 | 0.174 |
| 3     | log(nCases_maxNPI) ~ case10toNPI                | case10toNPI  | 0.087    | 0.046  | 0.129  | 9.97E-05 | 0.243 |
| 4     | log(nCases_maxNPI) ~ CESTtoNPI + log(popSize)   | CESTtoNPI    | 0.061    | 0.024  | 0.098  | 1.58E-03 | 0.315 |
| 4     | log(nCases_maxNPI) ~ CESTtoNPI + log(popSize)   | log(popSize) | 0.367    | -0.015 | 0.749  | 5.94E-02 | 0.315 |
| 5     | log(Ne) ~ CESTtoNPI                             | CESTtoNPI    | 0.052    | 0.031  | 0.074  | 1.17E-05 | 0.316 |
| 6     | log(Ne) ~ log(popSize)                          | log(popSize) | 0.399    | 0.128  | 0.669  | 4.63E-03 | 0.147 |
| 7     | log(Ne) ~ case10toNPI                           | case10toNPI  | 0.026    | -0.004 | 0.056  | 8.45E-02 | 0.057 |
| 8     | log(Ne) ~ log(popSize) + CESTtoNPI + R0         | log(popSize) | 0.233    | -0.042 | 0.508  | 9.56E-02 | 0.377 |
| 8     | log(Ne) ~ log(popSize) + CESTtoNPI + R0         | CESTtoNPI    | 0.044    | 0.02   | 0.067  | 5.39E-04 | 0.377 |
| 8     | log(Ne) ~ log(popSize) + CESTtoNPI + R0         | R0           | 0.006    | -0.001 | 0.013  | 8.14E-02 | 0.377 |
| 9     | log(deaths) ~ CESTtoNPI                         | CESTtoNPI    | 0.049    | 0.012  | 0.086  | 1.09E-02 | 0.114 |
| 10    | log(deaths) ~ log(popSize)                      | log(popSize) | 0.35     | -0.044 | 0.745  | 8.07E-02 | 0.055 |
| 11    | log(deaths) ~ case10toNPI                       | case10toNPI  | 0.004    | -0.043 | 0.051  | 8.59E-01 | 0.001 |
| 12    | log(deaths) ~ CESTtoNPI + log(popSize)          | CESTtoNPI    | 0.042    | 0.001  | 0.083  | 4.62E-02 | 0.124 |
| 12    | log(deaths) ~ CESTtoNPI + log(popSize)          | log(popSize) | 0.167    | -0.257 | 0.591  | 4.34E-01 | 0.124 |
| 13    | log(EstimatedI) ~ CESTtoNPI                     | CESTtoNPI    | 0.043    | 0.008  | 0.077  | 1.72E-02 | 0.186 |
| 14    | log(EstimatedI) ~ log(popSize)                  | log(popSize) | 0.087    | -0.355 | 0.529  | 6.89E-01 | 0.006 |
| 15    | log(EstimatedI) ~ case10toNPI                   | case10toNPI  | 0.079    | 0.023  | 0.135  | 7.47E-03 | 0.229 |
| 16    | log(EstimatedI) ~ CESTtoNPI * R0 + log(popSize) | CESTtoNPI    | 0.337    | 0.131  | 0.543  | 2.43E-03 | 0.437 |
| 16    | log(EstimatedI) ~ CESTtoNPI * R0 + log(popSize) | R0           | 3.619    | 1.084  | 6.155  | 6.98E-03 | 0.437 |
| 16    | log(EstimatedI) ~ CESTtoNPI * R0 + log(popSize) | log(popSize) | -0.12    | -0.587 | 0.347  | 6.02E-01 | 0.437 |
| 16    | log(EstimatedI) ~ CESTtoNPI * R0 + log(popSize) | CESTtoNPI:R0 | -0.135   | -0.231 | -0.038 | 8.18E-03 | 0.437 |

**nCases\_maxNPI:** number of reported cases at the time of the maximum non-pharmaceutical intervention (NPI).

**CESTtoNPI:** number of days between the central epidemic seeding time (CEST) and the maximum non-pharmaceutical intervention (NPI).

**popSize:** census population size for the site under study.

**case10toNPI:** number of days between the tenth reported case and the maximum non-pharmaceutical intervention (NPI).

**Ne:** viral effective population size at the time of the maximum non-pharmaceutical intervention (inferred using skygrowth model).

**R0:** basic reproduction number, inferred either in an SEIJR model (in regression model 16) or using skygrowth (in regressions model 8).

**Deaths:** number of deaths one month after the maximum non-pharmaceutical intervention.

**EstimatedI:** number of estimated infections at the time of the maximum non-pharmaceutical intervention, inferred in an SEIJR model.

**Supplementary Table 2 | Sites included and excluded from the analyses and results from the skygrowth analysis**

| Site analysed                | World region  | Number of sequences | Date of max NPI | Reported cases at max NPI | max NPI info | Deaths 1 month after max NPI | Population size | Date of tenth case | BEAST site | Skygrowth site | CEST       | Ne    | Skygrowth R0 | reasons for inclusion/exclusion | Source of data                                                                                                                                                                                                                                                          |
|------------------------------|---------------|---------------------|-----------------|---------------------------|--------------|------------------------------|-----------------|--------------------|------------|----------------|------------|-------|--------------|---------------------------------|-------------------------------------------------------------------------------------------------------------------------------------------------------------------------------------------------------------------------------------------------------------------------|
| Abruzzo, Italy               | Europe        | 50                  | 23/02/2020      | 0                         | Lockdown     | 46                           | 1312000         | 06/03/2020         | 1          | 1              | 27/02/2020 | 0.18  | -2.57        | notExcluded                     | <a href="https://www.regione.abruzzo.it/content/coronavirus-abruzzo-dati-aggiornati-al-24-marzo-positivi-689">https://www.regione.abruzzo.it/content/coronavirus-abruzzo-dati-aggiornati-al-24-marzo-positivi-689</a>                                                   |
| Ahmedabad, India             | Asia          | 100                 | 24/03/2020      | 36                        | Lockdown     | 70                           | 5571000         | 21/03/2020         | 1          | 1              | 02/03/2020 | 0.05  | 66.95        | notExcluded                     | <a href="https://www.indiatvnews.com/news/india/gujarat-new-coronavirus-cases-latest-update-today-covid-19-death-toll-610667">https://www.indiatvnews.com/news/india/gujarat-new-coronavirus-cases-latest-update-today-covid-19-death-toll-610667</a>                   |
| Andalusia, Spain             | Europe        | 169                 | 14/03/2020      | 269                       | Lockdown     | 836                          | 8427000         | 28/02/2020         | 0          | 1              | 08/02/2020 | 3.73  | 33.95        | notExcluded                     | <a href="https://www.mscbs.gob.es/profesionales/saludPublica/ccayes/alertasActual/nCov-China/documentos/Actualizacion_75_COVID-19.pdf">https://www.mscbs.gob.es/profesionales/saludPublica/ccayes/alertasActual/nCov-China/documentos/Actualizacion_75_COVID-19.pdf</a> |
| Antwerp, Belgium             | Europe        | 35                  | 18/03/2020      | 94                        | Lockdown     | 472                          | 498000          | 03/03/2020         | 1          | 1              | 12/03/2020 | 0.53  | 29.14        | notExcluded                     | <a href="https://epistat.sciensano.be/covid/covid19_historicaldata.html">https://epistat.sciensano.be/covid/covid19_historicaldata.html</a>                                                                                                                             |
| Australia, Australia         | Oceania       | 1674                | NA              | NA                        | NA           | NA                           | NA              | NA                 | 0          | 0              | NA         | NA    | NA           | travellersSampled               | NA                                                                                                                                                                                                                                                                      |
| Austria, Austria             | Europe        | 207                 | NA              | NA                        | NA           | NA                           | NA              | NA                 | 0          | 0              | NA         | NA    | NA           | smallerRegionAnalyzed           | NA                                                                                                                                                                                                                                                                      |
| Auvergne Rhone Alpes, France | Europe        | 77                  | 17/03/2020      | 240                       | Lockdown     | 927                          | 8027000         | 27/02/2020         | 1          | 1              | 16/02/2020 | NA    | NA           | notExcluded                     | <a href="https://fr.wikipedia.org/wiki/Pand%C3%A9mie_de_Covid-19_en_Auvergne-Rh%C3%B4ne-Alpes">https://fr.wikipedia.org/wiki/Pand%C3%A9mie_de_Covid-19_en_Auvergne-Rh%C3%B4ne-Alpes</a>                                                                                 |
| Bangkok, Thailand            | Asia          | 121                 | 21/03/2020      | 186                       | Lockdown     | 18                           | 8281000         | 28/01/2020         | 0          | 1              | 18/02/2020 | 2.32  | 43.25        | notExcluded                     | <a href="https://covid19.ddc.moph.go.th/en">https://covid19.ddc.moph.go.th/en</a>                                                                                                                                                                                       |
| Basque Country, Spain        | Europe        | 155                 | 14/03/2020      | 455                       | Lockdown     | 859                          | 2178000         | 03/03/2020         | 1          | 1              | 18/02/2020 | 2.55  | 143.93       | notExcluded                     | <a href="https://www.mscbs.gob.es/profesionales/saludPublica/ccayes/alertasActual/nCov-China/documentos/Actualizacion_75_COVID-19.pdf">https://www.mscbs.gob.es/profesionales/saludPublica/ccayes/alertasActual/nCov-China/documentos/Actualizacion_75_COVID-19.pdf</a> |
| Bavaria, Germany             | Europe        | 116                 | NA              | NA                        | NA           | NA                           | NA              | NA                 | 0          | 0              | NA         | NA    | NA           | smallerRegionAnalyzed           | NA                                                                                                                                                                                                                                                                      |
| Belgium                      | Europe        | 596                 | NA              | NA                        | NA           | NA                           | NA              | NA                 | 0          | 0              | NA         | NA    | NA           | smallerRegionAnalyzed           | NA                                                                                                                                                                                                                                                                      |
| Brazil                       | South America | 100                 | NA              | NA                        | NA           | NA                           | NA              | NA                 | 0          | 0              | NA         | NA    | NA           | tooBig                          | NA                                                                                                                                                                                                                                                                      |
| Brooklyn, NYC, NY, USA       | North America | 330                 | 22/03/2020      | 7075                      | Lockdown     | 3793                         | 2533000         | 08/03/2020         | 0          | 1              | 19/02/2020 | 15.71 | 111.39       | notExcluded                     | <a href="https://github.com/nychealth/coronavirus-data/tree/master/boro">https://github.com/nychealth/coronavirus-data/tree/master/boro</a>                                                                                                                             |
| Caddo Parish, LA, USA        | North America | 120                 | 22/03/2020      | 16                        | Lockdown     | 3                            | 240000          | 19/03/2020         | 0          | 1              | 05/03/2020 | 0.06  | 169.56       | notExcluded                     | <a href="https://github.com/CSSEGISandData/COVID-19/tree/master/csse_covid_19_data/csse_covid_19_time_series">https://github.com/CSSEGISandData/COVID-19/tree/master/csse_covid_19_data/csse_covid_19_time_series</a>                                                   |
| California, USA              | North America | 537                 | NA              | NA                        | NA           | NA                           | NA              | NA                 | 0          | 0              | NA         | NA    | NA           | smallerRegionAnalyzed           | NA                                                                                                                                                                                                                                                                      |
| Canada                       | North America | 205                 | NA              | NA                        | NA           | NA                           | NA              | NA                 | 0          | 0              | NA         | NA    | NA           | tooBig                          | NA                                                                                                                                                                                                                                                                      |
| Chile                        | South America | 138                 | NA              | NA                        | NA           | NA                           | NA              | NA                 | 0          | 0              | NA         | NA    | NA           | smallerRegionAnalyzed           | NA                                                                                                                                                                                                                                                                      |
| China                        | Asia          | 659                 | NA              | NA                        | NA           | NA                           | NA              | NA                 | 0          | 0              | NA         | NA    | NA           | smallerRegionAnalyzed           | NA                                                                                                                                                                                                                                                                      |
| Colombia                     | South America | 111                 | 24/03/2020      | 608                       | Lockdown     | 215                          | 49650000        | 12/03/2020         | 0          | 1              | 02/03/2020 | 2.75  | 43.91        | notExcluded                     | <a href="https://github.com/CSSEGISandData/COVID-19/tree/master/csse_covid_19_data/csse_covid_19_time_series">https://github.com/CSSEGISandData/COVID-19/tree/master/csse_covid_19_data/csse_covid_19_time_series</a>                                                   |
| Comunitat Valenciana, Spain  | Europe        | 353                 | 14/03/2020      | 442                       | Lockdown     | 907                          | 4975000         | 03/03/2020         | 1          | 1              | 13/02/2020 | 5.67  | 89.14        | notExcluded                     | <a href="https://www.mscbs.gob.es/profesionales/saludPublica/ccayes/alertasActual/nCov-China/documentos/Actualizacion_75_COVID-19.pdf">https://www.mscbs.gob.es/profesionales/saludPublica/ccayes/alertasActual/nCov-China/documentos/Actualizacion_75_COVID-19.pdf</a> |

|                                  |               |      |            |       |                     |      |           |            |   |   |            |      |         |                       |                                                                                                                                                                                                                                              |
|----------------------------------|---------------|------|------------|-------|---------------------|------|-----------|------------|---|---|------------|------|---------|-----------------------|----------------------------------------------------------------------------------------------------------------------------------------------------------------------------------------------------------------------------------------------|
| Connecticut, USA                 | North America | 165  | 28/03/2020 | 1524  | Lockdown            | 2011 | 3565000   | 13/03/2020 | 0 | 1 | 25/02/2020 | 5.46 | 41.93   | notExcluded           | <a href="https://github.com/CSSEGISandData/COVID-19/tree/master/csse_covid_19_data/csse_covid_19_time_series">https://github.com/CSSEGISandData/COVID-19/tree/master/csse_covid_19_data/csse_covid_19_time_series</a>                        |
| Democratic Republic of the Congo | Africa        | 113  | NA         | NA    | NA                  | NA   | NA        | NA         | 0 | 0 | NA         | NA   | NA      | smallerRegionAnalyzed | NA                                                                                                                                                                                                                                           |
| Denmark                          | Europe        | 677  | 13/03/2020 | 804   | Lockdown            | 273  | 5806000   | 03/03/2020 | 1 | 1 | 12/02/2020 | 6.22 | 108.07  | notExcluded           | <a href="https://github.com/CSSEGISandData/COVID-19/tree/master/csse_covid_19_data/csse_covid_19_time_series">https://github.com/CSSEGISandData/COVID-19/tree/master/csse_covid_19_data/csse_covid_19_time_series</a>                        |
| England, United Kingdom          | Europe        | 2593 | NA         | NA    | NA                  | NA   | NA        | NA         | 0 | 0 | NA         | NA   | NA      | tooBig                | NA                                                                                                                                                                                                                                           |
| Florida, USA                     | North America | 134  | 03/04/2020 | 10268 | Lockdown            | 1379 | 21480000  | 07/03/2020 | 0 | 1 | 20/02/2020 | 3.38 | 42.93   | notExcluded           | <a href="https://github.com/CSSEGISandData/COVID-19/tree/master/csse_covid_19_data/csse_covid_19_time_series">https://github.com/CSSEGISandData/COVID-19/tree/master/csse_covid_19_data/csse_covid_19_time_series</a>                        |
| France                           | Europe        | 261  | NA         | NA    | NA                  | NA   | NA        | NA         | 0 | 0 | NA         | NA   | NA      | smallerRegionAnalyzed | NA                                                                                                                                                                                                                                           |
| Gelderland, Netherlands          | Europe        | 148  | 12/03/2020 | 48    | Lockdown            | 0    | 2084000   | 06/03/2020 | 0 | 1 | 28/02/2020 | 1.00 | 24.60   | notExcluded           | <a href="https://bing.com/covid/local/gelderland_netherlands?vert=graph">https://bing.com/covid/local/gelderland_netherlands?vert=graph</a>                                                                                                  |
| Germany                          | Europe        | 175  | NA         | NA    | NA                  | NA   | NA        | NA         | 0 | 0 | NA         | NA   | NA      | smallerRegionAnalyzed | NA                                                                                                                                                                                                                                           |
| Ghent, Belgium                   | Europe        | 55   | 18/03/2020 | 76    | Lockdown            | 2538 | 248000    | 08/03/2020 | 1 | 1 | 07/03/2020 | 0.70 | 209.90  | notExcluded           | <a href="https://covid-19.sciensano.be/sites/default/files/Covid19/COVID-19_Daily%20report_20200417%20-%20NL.pdf">https://covid-19.sciensano.be/sites/default/files/Covid19/COVID-19_Daily%20report_20200417%20-%20NL.pdf</a>                |
| Guangdong, China                 | Asia          | 133  | 08/02/2020 | 1120  | Not a full lockdown | 8    | 113460000 | 20/01/2020 | 0 | 1 | 14/01/2020 | NA   | -120.00 | notExcluded           | <a href="http://2019ncov.chinacdc.cn/2019-nCoV/">http://2019ncov.chinacdc.cn/2019-nCoV/</a>                                                                                                                                                  |
| Gujarat, India                   | Asia          | 189  | NA         | NA    | NA                  | NA   | NA        | NA         | 0 | 0 | NA         | NA   | NA      | smallerRegionAnalyzed | NA                                                                                                                                                                                                                                           |
| Hauts de France, France          | Europe        | 49   | 17/03/2020 | 211   | Lockdown            | 1006 | 5978000   | 01/03/2020 | 1 | 1 | 23/02/2020 | 2.14 | 60.84   | notExcluded           | <a href="https://fr.wikipedia.org/wiki/Pand%C3%A9mie_de_Covid-19_dans_les_Hauts-de-France">https://fr.wikipedia.org/wiki/Pand%C3%A9mie_de_Covid-19_dans_les_Hauts-de-France</a>                                                              |
| Hubei, China                     | Asia          | 175  | NA         | NA    | NA                  | NA   | NA        | NA         | 0 | 0 | NA         | NA   | NA      | other                 | NA                                                                                                                                                                                                                                           |
| Iceland                          | Europe        | 482  | NA         | NA    | NA                  | NA   | NA        | NA         | 0 | 0 | NA         | NA   | NA      | travellersSampled     | NA                                                                                                                                                                                                                                           |
| Ile de France, France            | Europe        | 70   | 17/03/2020 | 1241  | Lockdown            | 4319 | 12210000  | 29/02/2020 | 1 | 1 | 20/02/2020 | 5.32 | 49.84   | notExcluded           | <a href="https://coronavirus.app/tracking/ile-de-france">https://coronavirus.app/tracking/ile-de-france</a>                                                                                                                                  |
| Illinois, USA                    | North America | 112  | 21/03/2020 | 751   | Lockdown            | 1349 | 12670000  | 09/03/2020 | 1 | 1 | 15/02/2020 | 4.07 | 103.26  | notExcluded           | <a href="https://coronavirus.app/tracking/illinois">https://coronavirus.app/tracking/illinois</a> ;<br><a href="https://en.wikipedia.org/wiki/COVID-19_pandemic_in_Illinois">https://en.wikipedia.org/wiki/COVID-19_pandemic_in_Illinois</a> |
| India                            | Asia          | 614  | NA         | NA    | NA                  | NA   | NA        | NA         | 0 | 0 | NA         | NA   | NA      | smallerRegionAnalyzed | NA                                                                                                                                                                                                                                           |
| Innsbruck, Austria               | Europe        | 23   | 16/03/2020 | 102   | Lockdown            | 80   | 311000    | 01/03/2020 | 1 | 1 | 12/03/2020 | 0.35 | 20.05   | notExcluded           | <a href="https://experience.arcgis.com/experience/d225672c788d4847b231f1283d63aead/page/page_3/">https://experience.arcgis.com/experience/d225672c788d4847b231f1283d63aead/page/page_3/</a>                                                  |
| Israel                           | Middle East   | 151  | NA         | NA    | NA                  | NA   | NA        | NA         | 0 | 0 | NA         | NA   | NA      | smallerRegionAnalyzed | NA                                                                                                                                                                                                                                           |
| Italy                            | Europe        | 104  | NA         | NA    | NA                  | NA   | NA        | NA         | 0 | 0 | NA         | NA   | NA      | smallerRegionAnalyzed | NA                                                                                                                                                                                                                                           |
| Japan                            | Asia          | 122  | NA         | NA    | NA                  | NA   | NA        | NA         | 0 | 0 | NA         | NA   | NA      | travellersSampled     | NA                                                                                                                                                                                                                                           |
| Jerusalem District, Israel       | Middle East   | 34   | 17/03/2020 | 44    | Lockdown            | 16   | 1083000   | 10/03/2020 | 1 | 1 | 15/03/2020 | NA   | NA      | notExcluded           | <a href="https://covid19.who.int/region/euro/country/il">https://covid19.who.int/region/euro/country/il</a>                                                                                                                                  |
| King County, WA, USA             | North America | 247  | 23/03/2020 | 1166  | Lockdown            | 184  | 2253000   | 01/03/2020 | 1 | 1 | 29/01/2020 | 1.58 | 79.28   | notExcluded           | <a href="https://www.kingcounty.gov/depts/health/covid-19/data/daily-summary.aspx">https://www.kingcounty.gov/depts/health/covid-19/data/daily-summary.aspx</a>                                                                              |
| Kinshasa, DRC                    | Africa        | 110  | 09/04/2020 | 203   | Lockdown            | 41   | 11860000  | 11/03/2020 | 1 | 1 | 26/02/2020 | 1.76 | 22.30   | notExcluded           | <a href="https://www.stopcoronavirusrdc.info/">https://www.stopcoronavirusrdc.info/</a>                                                                                                                                                      |
| Liege, Belgium                   | Europe        | 269  | 18/03/2020 | 322   | Lockdown            | 730  | 196000    | 03/03/2020 | 0 | 1 | 01/03/2020 | 2.97 | 69.27   | notExcluded           | <a href="https://datastudio.google.com/embed/u/0/reporting/c14a5cfc-cab7-4812-848c-0369173148ab/page/QTSKB">https://datastudio.google.com/embed/u/0/reporting/c14a5cfc-cab7-4812-848c-0369173148ab/page/QTSKB</a>                            |
| Louisiana, USA                   | North America | 295  | NA         | NA    | NA                  | NA   | NA        | NA         | 0 | 0 | NA         | NA   | NA      | smallerRegionAnalyzed | NA                                                                                                                                                                                                                                           |
| Luxembourg                       | Europe        | 227  | 17/03/2020 | 221   | Lockdown            | 69   | 614000    | 12/03/2020 | 1 | 1 | 13/02/2020 | 4.86 | 115.58  | notExcluded           | <a href="https://github.com/CSSEGISandData/COVID-19/tree/master/csse_covid_19_data">https://github.com/CSSEGISandData/COVID-19/tree/master/csse_covid_19_data</a>                                                                            |

|                              |               |      |            |       |                     |      |          |            |   |   |            |       |        |                       |                                                                                                                                                                                                                           |
|------------------------------|---------------|------|------------|-------|---------------------|------|----------|------------|---|---|------------|-------|--------|-----------------------|---------------------------------------------------------------------------------------------------------------------------------------------------------------------------------------------------------------------------|
| Madinah, Saudi Arabia        | Middle East   | 43   | 23/03/2020 | 1     | Lockdown            | 32   | 1100000  | 26/03/2020 | 1 | 1 | 05/03/2020 | 0.13  | 53.76  | notExcluded           | <a href="https://covid19.moh.gov.sa/">https://covid19.moh.gov.sa/</a>                                                                                                                                                     |
| Makkah, Saudi Arabia         | Middle East   | 51   | 23/03/2020 | 155   | Lockdown            | 49   | 1535000  | 12/03/2020 | 1 | 1 | 26/02/2020 | 0.27  | 64.17  | notExcluded           | <a href="https://covid19.moh.gov.sa/">https://covid19.moh.gov.sa/</a>                                                                                                                                                     |
| Manhattan, NY, NYC, USA      | North America | 360  | 22/03/2020 | 4318  | Lockdown            | 1581 | 1629000  | 08/03/2020 | 0 | 1 | 17/02/2020 | 16.89 | 127.43 | notExcluded           | <a href="https://www1.nyc.gov/site/doh/covid/covid-19-data-boroughs.page">https://www1.nyc.gov/site/doh/covid/covid-19-data-boroughs.page</a>                                                                             |
| Massachusetts, USA           | North America | 349  | 24/03/2020 | 1159  | Lockdown            | 2557 | 6893000  | 07/03/2020 | 0 | 1 | 09/02/2020 | 5.20  | 36.98  | notExcluded           | <a href="https://en.wikipedia.org/wiki/COVID-19_pandemic_in_Massachusetts">https://en.wikipedia.org/wiki/COVID-19_pandemic_in_Massachusetts</a>                                                                           |
| Michigan, USA                | North America | 433  | 24/03/2020 | 1791  | Lockdown            | 2977 | 9987000  | 12/03/2020 | 0 | 1 | 10/02/2020 | 11.40 | 74.33  | notExcluded           | <a href="https://en.wikipedia.org/wiki/COVID-19_pandemic_in_Michigan">https://en.wikipedia.org/wiki/COVID-19_pandemic_in_Michigan</a>                                                                                     |
| Minnesota, USA               | North America | 168  | 27/03/2020 | 398   | Lockdown            | 272  | 5640000  | 13/03/2020 | 0 | 1 | 21/02/2020 | 1.38  | 63.90  | notExcluded           | <a href="https://en.wikipedia.org/wiki/COVID-19_pandemic_in_Minnesota">https://en.wikipedia.org/wiki/COVID-19_pandemic_in_Minnesota</a>                                                                                   |
| Munich, Germany              | Europe        | 109  | 09/03/2020 | 39    | Lockdown            | 24   | 1472000  | 24/02/2020 | 1 | 1 | 29/02/2020 | 0.83  | 189.73 | notExcluded           | <a href="https://www.muenchen.de/rathaus/Stadinfos/Coronavirus-Fallzahlen.html">https://www.muenchen.de/rathaus/Stadinfos/Coronavirus-Fallzahlen.html</a>                                                                 |
| Netherlands                  | Europe        | 1310 | NA         | NA    | NA                  | NA   | NA       | NA         | 0 | 0 | NA         | NA    | NA     | smallerRegionAnalyzed | NA                                                                                                                                                                                                                        |
| New Orleans, LA, USA         | North America | 106  | 22/03/2020 | 451   | Lockdown            | 13   | 391000   | 11/03/2020 | 1 | 1 | 27/02/2020 | 1.89  | 170.35 | notExcluded           | <a href="https://github.com/nytimes/covid-19-data/blob/master/us-counties.csv">https://github.com/nytimes/covid-19-data/blob/master/us-counties.csv</a>                                                                   |
| New South Wales, Australia   | Oceania       | 406  | NA         | NA    | NA                  | NA   | NA       | NA         | 0 | 0 | NA         | NA    | NA     | travellersSampled     | NA                                                                                                                                                                                                                        |
| NA                           | North America | 1267 | NA         | NA    | NA                  | NA   | NA       | NA         | 0 | 0 | NA         | NA    | NA     | smallerRegionAnalyzed | NA                                                                                                                                                                                                                        |
| New Zealand                  | Oceania       | 226  | NA         | NA    | NA                  | NA   | NA       | NA         | 0 | 0 | NA         | NA    | NA     | travellersSampled     | NA                                                                                                                                                                                                                        |
| North Brabant, Netherlands   | Europe        | 125  | 23/03/2020 | 4749  | Not a full lockdown | 854  | 2545000  | 02/03/2020 | 0 | 1 | 01/03/2020 | 2.81  | 85.51  | notExcluded           | <a href="https://data.rivm.nl/covid-19/">https://data.rivm.nl/covid-19/</a>                                                                                                                                               |
| Northern Ireland, UK         | Europe        | 261  | 28/03/2020 | 76    | Lockdown            | 466  | 1882000  | 18/03/2020 | 0 | 1 | 15/02/2020 | 3.92  | 76.54  | notExcluded           | <a href="https://files.nisra.gov.uk/Deaths/Weekly-Deaths-Dashboard.html">https://files.nisra.gov.uk/Deaths/Weekly-Deaths-Dashboard.html</a>                                                                               |
| Portugal                     | Europe        | 538  | 19/03/2020 | 785   | Lockdown            | 687  | 10280000 | 06/03/2020 | 1 | 1 | 01/02/2020 | 11.11 | 101.66 | notExcluded           | <a href="https://covid19.min-saude.pt/">https://covid19.min-saude.pt/</a>                                                                                                                                                 |
| Queens, NYC, NY, USA         | North America | 155  | 22/03/2020 | 15168 | Lockdown            | 3934 | 2273000  | 04/03/2020 | 0 | 1 | 27/02/2020 | 7.98  | 187.60 | notExcluded           | <a href="https://www1.nyc.gov/site/doh/covid/covid-19-data-boroughs.page">https://www1.nyc.gov/site/doh/covid/covid-19-data-boroughs.page</a>                                                                             |
| Reykjavik, Iceland           | Europe        | 482  | NA         | NA    | NA                  | NA   | NA       | NA         | 0 | 0 | NA         | NA    | NA     | travellersSampled     | NA                                                                                                                                                                                                                        |
| Russia, Russian Federation   | Asia          | 195  | NA         | NA    | NA                  | NA   | NA       | NA         | 0 | 0 | NA         | NA    | NA     | smallerRegionAnalyzed | NA                                                                                                                                                                                                                        |
| St. Petersburg, Russia       | Europe        | 128  | 30/03/2020 | 50    | Lockdown            | 63   | 4991000  | 06/03/2020 | 1 | 1 | 09/03/2020 | 0.90  | 72.34  | notExcluded           | <a href="https://www.rospotrebnadzor.ru/en/">https://www.rospotrebnadzor.ru/en/</a>                                                                                                                                       |
| San Diego, CA, USA           | North America | 124  | 19/03/2020 | 105   | Lockdown            | 70   | 1426000  | 14/03/2020 | 1 | 1 | 28/02/2020 | 2.04  | 47.59  | notExcluded           | <a href="https://github.com/CSSEGISandData/COVID-19/tree/master/csse_covid_19_data/csse_covid_19_daily_reports">https://github.com/CSSEGISandData/COVID-19/tree/master/csse_covid_19_data/csse_covid_19_daily_reports</a> |
| San Francisco, CA, USA       | North America | 147  | 16/03/2020 | 37    | Lockdown            | 17   | 883000   | 08/03/2020 | 1 | 1 | 24/02/2020 | 2.34  | 46.65  | notExcluded           | <a href="https://github.com/CSSEGISandData/COVID-19/tree/master/csse_covid_19_data/csse_covid_19_daily_reports">https://github.com/CSSEGISandData/COVID-19/tree/master/csse_covid_19_data/csse_covid_19_daily_reports</a> |
| Santa Clara County, CA, USA  | North America | 214  | 16/03/2020 | 138   | Lockdown            | 65   | 1928000  | 03/03/2020 | 0 | 1 | 16/01/2020 | 2.08  | 18.19  | notExcluded           | <a href="https://github.com/CSSEGISandData/COVID-19/tree/master/csse_covid_19_data/csse_covid_19_daily_reports">https://github.com/CSSEGISandData/COVID-19/tree/master/csse_covid_19_data/csse_covid_19_daily_reports</a> |
| Saudi Arabia                 | Middle East   | 105  | NA         | NA    | NA                  | NA   | NA       | NA         | 0 | 0 | NA         | NA    | NA     | smallerRegionAnalyzed | NA                                                                                                                                                                                                                        |
| Scotland, UK                 | Europe        | 627  | 23/03/2020 | 499   | Lockdown            | 1062 | 5454000  | 06/03/2020 | 0 | 1 | 05/02/2020 | 8.86  | 105.19 | notExcluded           | <a href="https://www.gov.scot/coronavirus-covid-19/">https://www.gov.scot/coronavirus-covid-19/</a>                                                                                                                       |
| Singapore                    | Asia          | 146  | 07/04/2020 | 1481  | Lockdown            | 20   | 5639000  | 30/01/2020 | 0 | 1 | 11/02/2020 | 1.81  | 43.12  | notExcluded           | <a href="https://www.moh.gov.sg/">https://www.moh.gov.sg/</a>                                                                                                                                                             |
| South Coast District, Israel | Middle East   | 47   | 17/03/2020 | 44    | Lockdown            | 3    | 1240000  | 10/03/2020 | 1 | 1 | 10/03/2020 | 1.00  | 78.47  | notExcluded           | <a href="https://covid19.who.int/region/euro/country/il">https://covid19.who.int/region/euro/country/il</a>                                                                                                               |
| South Holland, Netherlands   | Europe        | 191  | 23/03/2020 | 814   | Not a full lockdown | 643  | 3709000  | 07/03/2020 | 0 | 1 | 04/03/2020 | 2.10  | 92.87  | notExcluded           | <a href="https://data.rivm.nl/covid-19/">https://data.rivm.nl/covid-19/</a>                                                                                                                                               |

|                           |               |      |            |      |                     |      |          |            |   |   |            |       |        |                       |                                                                                                                                                                                                                                                                                                                                                 |
|---------------------------|---------------|------|------------|------|---------------------|------|----------|------------|---|---|------------|-------|--------|-----------------------|-------------------------------------------------------------------------------------------------------------------------------------------------------------------------------------------------------------------------------------------------------------------------------------------------------------------------------------------------|
| Spain                     | Europe        | 849  | NA         | NA   | NA                  | NA   | NA       | NA         | 0 | 0 | NA         | NA    | NA     | smallerRegionAnalyzed | NA                                                                                                                                                                                                                                                                                                                                              |
| Sweden                    | Europe        | 270  | 17/03/2020 | 1265 | Not a full lockdown | 1757 | 10230000 | 28/02/2020 | 0 | 1 | 18/02/2020 | 4.07  | 96.71  | notExcluded           | <a href="https://www.folkhalsomyndigheten.se/the-public-health-agency-of-sweden/">https://www.folkhalsomyndigheten.se/the-public-health-agency-of-sweden/</a>                                                                                                                                                                                   |
| Switzerland               | Europe        | 270  | 17/03/2020 | 2200 | Not a full lockdown | 1281 | 8570000  | 29/02/2020 | 1 | 1 | 09/02/2020 | 6.45  | 114.77 | notExcluded           | <a href="https://www.bag.admin.ch/bag/en/home/krankheiten/ausbrueche-epidemien-pandemien/aktuelle-ausbrueche-epidemien/novel-cov/situation-schweiz-und-international.html">https://www.bag.admin.ch/bag/en/home/krankheiten/ausbrueche-epidemien-pandemien/aktuelle-ausbrueche-epidemien/novel-cov/situation-schweiz-und-international.html</a> |
| Sydney, Australia         | Oceania       | 405  | NA         | NA   | NA                  | NA   | NA       | NA         | 0 | 0 | NA         | NA    | NA     | travellersSampled     | NA                                                                                                                                                                                                                                                                                                                                              |
| Taipei, Taiwan            | Asia          | 38   | 05/03/2020 | 44   | Not a full lockdown | 2    | 2646000  | 03/02/2020 | 1 | 1 | 24/02/2020 | 1.85  | 16.90  | notExcluded           | <a href="https://github.com/CSSEGISandData/COVID-19">https://github.com/CSSEGISandData/COVID-19</a>                                                                                                                                                                                                                                             |
| Telangana, India          | Asia          | 95   | 22/03/2020 | 27   | Lockdown            | 23   | 35190000 | 18/03/2020 | 1 | 1 | 16/02/2020 | NA    | NA     | notExcluded           | <a href="https://www.covid19india.org/">https://www.covid19india.org/</a>                                                                                                                                                                                                                                                                       |
| Tel Aviv District, Israel | Middle East   | 38   | 17/03/2020 | 61   | Lockdown            | 24   | 1388000  | 10/03/2020 | 1 | 1 | 16/03/2020 | 0.36  | 53.94  | notExcluded           | <a href="https://covid19.who.int/region/euro/country/il">https://covid19.who.int/region/euro/country/il</a>                                                                                                                                                                                                                                     |
| Texas, USA                | North America | 298  | 31/03/2020 | 3570 | Lockdown            | 812  | 2.90E+07 | 24/02/2020 | 0 | 1 | 24/02/2020 | 1.26  | 75.19  | notExcluded           | <a href="https://github.com/CSSEGISandData/COVID-19">https://github.com/CSSEGISandData/COVID-19</a>                                                                                                                                                                                                                                             |
| Thailand                  | Asia          | 166  | NA         | NA   | NA                  | NA   | NA       | NA         | 0 | 0 | NA         | NA    | NA     | smallerRegionAnalyzed | NA                                                                                                                                                                                                                                                                                                                                              |
| Utah, USA                 | North America | 241  | 27/03/2020 | 480  | Lockdown            | 41   | 3206000  | 14/03/2020 | 0 | 1 | 03/03/2020 | 3.56  | 84.10  | notExcluded           | <a href="https://github.com/CSSEGISandData/COVID-19">https://github.com/CSSEGISandData/COVID-19</a>                                                                                                                                                                                                                                             |
| Valencia, Spain           | Europe        | 300  | NA         | NA   | NA                  | NA   | NA       | NA         | 0 | 0 | NA         | NA    | NA     | betterLabel           | NA                                                                                                                                                                                                                                                                                                                                              |
| Victoria, Australia       | Oceania       | 1153 | NA         | NA   | NA                  | NA   | NA       | NA         | 0 | 0 | NA         | NA    | NA     | travellersSampled     | NA                                                                                                                                                                                                                                                                                                                                              |
| Virginia, USA             | North America | 227  | 30/03/2020 | 1020 | Lockdown            | 522  | 8536000  | 11/03/2020 | 0 | 1 | 03/03/2020 | 1.47  | 46.39  | notExcluded           | <a href="https://github.com/CSSEGISandData/COVID-19">https://github.com/CSSEGISandData/COVID-19</a>                                                                                                                                                                                                                                             |
| Wales, UK                 | Europe        | 541  | 23/03/2020 | 418  | Lockdown            | 624  | 3136000  | 10/03/2020 | 0 | 1 | 02/02/2020 | 25.50 | 69.38  | notExcluded           | <a href="https://bing.com/covid/local/wales_unitedkingdom?vert=graph">https://bing.com/covid/local/wales_unitedkingdom?vert=graph</a>                                                                                                                                                                                                           |
| Washington, USA           | North America | 1667 | NA         | NA   | NA                  | NA   | NA       | NA         | 0 | 0 | NA         | NA    | NA     | smallerRegionAnalyzed | NA                                                                                                                                                                                                                                                                                                                                              |
| Wisconsin, USA            | North America | 311  | 23/03/2020 | 418  | Lockdown            | 248  | 5822000  | 09/03/2020 | 1 | 1 | 12/02/2020 | 4.33  | 49.95  | notExcluded           | <a href="https://github.com/CSSEGISandData/COVID-19">https://github.com/CSSEGISandData/COVID-19</a>                                                                                                                                                                                                                                             |
| Wuhan, China              | Asia          | 174  | NA         | NA   | NA                  | NA   | NA       | NA         | 0 | 0 | NA         | NA    | NA     | other                 | NA                                                                                                                                                                                                                                                                                                                                              |
| Yakima County, WA, USA    | North America | 227  | 23/03/2020 | 25   | Lockdown            | 38   | 251000   | 20/03/2020 | 0 | 1 | 19/02/2020 | 1.25  | 68.36  | notExcluded           | <a href="https://github.com/CSSEGISandData/COVID-19">https://github.com/CSSEGISandData/COVID-19</a>                                                                                                                                                                                                                                             |

Note: Data and sources of data are shown for all 57 sites included in the skygrowth analysis. The BEAST site and Skygrowth site column indicate whether or not that site was included in each set of analyses. CEST- Central epidemic seeding time (see Methods). Ne - Viral effective population size

**Supplementary Table 3 | Results from the BEAST analysis and mobility correlation analysis for 30 sites.**

| Site analysed                | BEAST R0 | Estimated infections at max NPI | Sample Proportion at max NPI | Mobility correlation (r) | p-value  |
|------------------------------|----------|---------------------------------|------------------------------|--------------------------|----------|
| Abruzzo, Italy               | 1.64     | 29.6                            | 0                            | 0.541                    | 1.16E-05 |
| Ahmedabad, India             | 2.46     | 143.8                           | 25.03                        | -0.227                   | 0.0896   |
| Antwerp, Belgium             | 1.84     | 1155.8                          | 8.11                         | 0.745                    | 5.50E-10 |
| Auvergne Rhone Alpes, France | 2.54     | 16666                           | 1.44                         | 0.881                    | 2.92E-11 |
| Basque Country, Spain        | 1.88     | 6845                            | 6.65                         | 0.918                    | 8.68E-15 |
| Comunitat Valenciana, Spain  | 2.16     | 6601.9                          | 6.7                          | 0.894                    | 8.57E-15 |
| Denmark                      | 2.25     | 1525.6                          | 52.7                         | 0.959                    | 4.68E-19 |
| Ghent, Belgium               | 2.45     | 4295.5                          | 1.78                         | 0.72                     | 1.15E-08 |
| Hauts de France, France      | 2.46     | 4744.5                          | 4.45                         | 0.94                     | 8.37E-19 |
| Ile de France, France        | 2.97     | 18982.8                         | 6.54                         | 0.796                    | 2.34E-11 |
| Illinois, USA                | 1.79     | 13146.5                         | 5.71                         | 0.752                    | 2.09E-10 |
| Innsbruck, Austria           | 2.3      | 2063.9                          | 4.92                         | 0.643                    | 2.03E-07 |
| Jerusalem District, Israel   | 1.83     | 615.3                           | 7.15                         | 0.749                    | 7.34E-11 |
| King County, WA, USA         | 2.35     | 11324.4                         | 10.3                         | 0.913                    | 6.88E-24 |
| Kinshasa, DRC                | 2.17     | 1878.5                          | 10.81                        | NA                       | NA       |
| Luxembourg                   | 2.37     | 5743.8                          | 3.85                         | 0.897                    | 1.52E-26 |
| Madinah, Saudi Arabia        | 2.72     | 3172.9                          | 0.03                         | 0.727                    | 1.53E-08 |
| Makkah, Saudi Arabia         | 1.53     | 328.7                           | 47.16                        | 0.749                    | 2.74E-08 |
| Munich, Germany              | 2.09     | 2240.3                          | 1.76                         | 0.827                    | 4.38E-13 |
| New Orleans, LA, USA         | 4.18     | 6055.1                          | 7.45                         | 0.826                    | 6.02E-09 |
| Portugal                     | 2.79     | 1868.9                          | 42                           | 0.673                    | 3.88E-09 |
| St. Petersburg, Russia       | 1.88     | 2893                            | 1.73                         | 0.809                    | 1.42E-13 |

|                              |      |         |       |       |          |
|------------------------------|------|---------|-------|-------|----------|
| San Diego, CA, USA           | 2.23 | 11248.2 | 0.93  | 0.928 | 1.45E-32 |
| San Francisco, CA, USA       | 2.13 | 7724.6  | 0.48  | 0.934 | 3.77E-27 |
| South Coast District, Israel | 2.2  | 1589.7  | 2.77  | 0.858 | 7.31E-13 |
| Switzerland                  | 2.28 | 3950.1  | 55.69 | 0.781 | 2.85E-09 |
| Taipei, Taiwan               | 1.76 | 2795.6  | 1.57  | 0.593 | 9.20E-07 |
| Telangana, India             | 3.28 | 525.8   | 5.14  | 0.476 | 0.000947 |
| Tel Aviv District, Israel    | 2.09 | 1450.3  | 4.21  | 0.72  | 1.20E-09 |
| Wisconsin, USA               | 2.29 | 6802.2  | 6.15  | 0.829 | 1.05E-13 |

Note:  $R_0$  and the number of infections at the time of the maximum non-pharmaceutical intervention (max NPI) were inferred in an SEIJR model using BEAST. Sample proportion was calculated at max NPI as the number of reported infections divided by the number of estimated infections. The Pearson's correlation coefficient and its p-value were calculated from the reproductive number over time  $R_t$  and changes in mobility, as provided by Google.
